RESEARCH ARTICLE

# Predictors of Duration and Treatment Failure of Severe Pneumonia in Hospitalized Young Nepalese Children

Sudha Basnet<sup>1,2\*</sup>, Arun Sharma<sup>1</sup>, Maria Mathisen<sup>3</sup>, Prakash Sunder Shrestha<sup>1</sup>, Ram Kumar Ghimire<sup>4</sup>, Dhiraj Man Shrestha<sup>5</sup>, Palle Valentiner-Branth<sup>6</sup>, Halvor Sommerfelt<sup>2,7</sup>, Tor A. Strand<sup>2,8</sup>

**1** Child Health Department, Institute of Medicine, Tribhuvan University, Kathmandu, Nepal, **2** Centre for International Health and Centre for Intervention Science in Maternal and Child health, University of Bergen, Bergen, Norway, **3** Department of Microbiology and Infection Control, University Hospital of North Norway, Tromsø, Norway, **4** Department of Radiology, Institute of Medicine, Tribhuvan University, Kathmandu, Nepal, **5** Department of Radiology, Kathmandu Medical College and Teaching Hospital, Kathmandu University, Nepal, **6** Department of Infectious Disease Epidemiology, Division of National Health Surveillance & Research, Statens Serum Institut, Copenhagen, Denmark, **7** Department of International Public Health, the Norwegian Institute of Public Health, Oslo, Norway, **8** Division of Medical Services, Innlandet Hospital Trust, Lillehammer, Norway

\* [sudhacbasnet@gmail.com](mailto:sudhacbasnet@gmail.com)

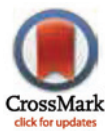

OPEN ACCESS

**Citation:** Basnet S, Sharma A, Mathisen M, Shrestha PS, Ghimire RK, Shrestha DM, et al. (2015) Predictors of Duration and Treatment Failure of Severe Pneumonia in Hospitalized Young Nepalese Children. PLoS ONE 10(3): e0122052. doi:10.1371/journal.pone.0122052

**Academic Editor:** Claire Thome, UCL Institute of Child Health, University College London, UNITED KINGDOM

**Received:** October 9, 2014

**Accepted:** February 7, 2015

**Published:** March 23, 2015

**Copyright:** © 2015 Basnet et al. This is an open access article distributed under the terms of the [Creative Commons Attribution License](https://creativecommons.org/licenses/by/4.0/), which permits unrestricted use, distribution, and reproduction in any medium, provided the original author and source are credited.

**Data Availability Statement:** All relevant data are within the manuscript and in a supplementary Excel spreadsheet, [S1 Dataset](#). For further queries authors may be contacted at the following email addresses: [sudhacbasnet@gmail.com](mailto:sudhacbasnet@gmail.com), [tor.strand@cih.uib.no](mailto:tor.strand@cih.uib.no).

**Funding:** This study was funded by grants from the European Commission (EU-INCO-DC contract number INCO-FP6-003740), the Meltzer Foundation in Bergen, Norway, the Danish Council of Developmental Research (project number: 91128), the Research Council of Norway (RCN project

## Abstract

### Background

Pneumonia in young children is still the most frequent cause of death in developing countries. We aimed to identify predictors for recovery and treatment failure in children hospitalized with severe pneumonia.

### Methods

We enrolled 610 Nepalese children, aged 2 – 35 months from February 2006 to June 2008. Study participants were provided with standard treatment for pneumonia and followed up until discharge. Three multiple regression models representing clinical variables, clinical and radiological combined and all variables, including C-reactive protein (CRP) and viral etiology were used to assess the associations.

### Results

The median age of study participants was 6 months with 493 (82%) infants and 367 (61%) males. The median time (IQR) till recovery was 49 (31, 87) hours and treatment failure was experienced by 209 (35%) of the children. Younger age, hypoxia on admission and radiographic pneumonia were independent predictors for both prolonged recovery and risk of treatment failure. While wasting and presence of any danger sign also predicted slower recovery, Parainfluenza type 1 isolated from the nasopharynx was associated with earlier resolution of illness. Gender, being breastfed, stunting, high fever, elevated CRP, presence of other viruses and supplementation with oral zinc did not show any significant association with these outcomes.

numbers: 151054 and 172226) and a grant from the South-Eastern Norway Regional Health Authority (grant number: 2012090) The sponsors of the study had no role in study design, data collection, data analysis, data interpretation, or writing of the report. The corresponding author had full access to all the data in the study and took the final decision to submit this report for publication.

**Competing Interests:** The authors have declared that no competing interests exist.

## Conclusion

Age, hypoxia and consolidation on chest radiograph were significant predictors for time till recovery and treatment failure in children with severe pneumonia. While chest radiograph is not always needed, detection and treatment of hypoxia is a crucial step to guide the management of hospitalized children with pneumonia.

## Introduction

Pneumonia is an important cause of illness and leading cause of death in young children in developing countries [1]. More than 99% of pneumonia deaths occur in low- and middle-income countries (LMICs) [2]. The recent estimate is a median incidence of 0.22 episodes per child year (e/cy) with severe pneumonia contributing to 11.5% in LMICs [3]. In Nepal the estimated incidence of pneumonia is 0.24 e/cy with 11.5% severe episodes in children under 5 years of age [3]. While several preventable risk factors for severe pneumonia in developing countries have been identified [4] there is limited data on predictors of illness duration. Because the diagnosis of severe pneumonia in low income settings to a large extent relies on clinical criteria, it is important to identify objective clinical signs at baseline that may guide subsequent management of a severe pneumonia episode. The World Health Organization (WHO) uses evidence based clinical guidelines for the care of sick children in hospitals of resource poor settings [5,6]. The aim of this study is to identify predictors for duration and treatment failure of WHO-defined severe pneumonia in hospitalized young children in Nepal.

## Methods

The study participants were recruited into a clinical trial [7] of zinc as adjuvant therapy to standard treatment of an acute episode of severe pneumonia, defined using WHO guidelines [8] and registered at clinicaltrials.gov as NCT00252304. Clearances were obtained from the ethics board of the Institute of Medicine, Tribhuvan University and Nepal Health Research Council, Kathmandu. We enrolled 610 children, 2–35 months of age from February 2006 to June 2008 at the Kanti Children's referral hospital in Kathmandu, Nepal. The Kathmandu valley lies at an altitude of approximately 1400 meters above sea level.

Eligible children presenting to the Kanti Children's hospital Emergency or Outpatient departments were screened for enrollment by trained physicians and first assessed for hypoxemia using a pulse oximeter (Nellcor Puritan Bennett NPB-40, Pleasanton, CA, USA) with a pediatric sensor (Nellcor Pedichek D-YSPD) and for presence of wheezing. Oxygen saturation ( $SpO_2$ ) was recorded twice after stabilization of the reading for one minute. The higher of the two readings was used. For children with  $SpO_2 < 90\%$ , oxygen was provided prior to further evaluation. This oxygen saturation of  $< 90\%$  was the threshold used to define hypoxia based on WHO guidelines [8]. Children with wheezing were given up to three doses of nebulized Salbutamol 15 minutes apart, reassessed and excluded if lower chest indrawing (LCI) disappeared. History of illness was recorded and the findings of the physical examination were captured in a standardized form. Children were weighed using an Electronic Scale 890 (SECA, Hamburg, Germany) to the nearest 100 grams. Height in children 2 years of age or older was measured using a standard wooden height measuring board, while recumbent length in children less than 2 years old was measured using an infantometer, both to the nearest 0.1 cm. Length-for-age and weight-for-length z scores were calculated using the 2006 WHO Child Growth Standards when

these parameters were below -2z, the children were considered to be stunted or wasted, respectively. We measured hemoglobin concentrations using Hemocue (Ångelholm, Sweden). Chest x-rays (CXR) were taken in all children, not only to identify infiltrations, but also to detect pleural effusion, pneumothorax or suspected heart disease, which would make a child ineligible for the study. Children with recurrent wheezing (defined as >3 episodes over the past 6 months and on treatment with bronchodilators), disappearance of lower chest indrawing (LCI) after nebulized Salbutamol, severe wasting (weight-for-length < -3z), severe anemia (hemoglobin < 7 g/dL), heart disease, documented tuberculosis, concomitant diarrhea with dehydration and those with severe illness requiring special care or surgical intervention were also excluded. We used standardized WHO criteria to identify radiographic pneumonia [9]. The CXRs were interpreted independently by two radiologists blinded to clinical data, classifying findings as end-point consolidation, other infiltrates or normal. If the two radiologists did not reach an agreement on consolidation, a second round of interpretation was carried out to arrive at a consensus. Informed consent was obtained for eligible children. Parents who could read and write signed the consent statement after they had read a written statement in the local Nepali language. For parents who were unable to read/write, verbal informed consent was obtained in the presence of a witness, whose name and signature was recorded in a register along with the child serial number of that particular participant. This procedure was approved by the ethics committee for the study. After obtaining consent, blood was collected and the first dose of intravenous antibiotics administered. This was followed by collection of nasopharyngeal aspirates for identification of 7 respiratory viruses, namely respiratory syncytial (RSV), Influenza A and B, parainfluenza (PIV) type 1, 2, and 3, and human metapneumovirus, using a commercially available multiplex reverse transcription polymerase chain reaction (PCR) assay. Details of the sampling technique and analyses have been described elsewhere [10].

## Definitions

**Acute episode of severe pneumonia**—A child presenting with cough (duration < 14 days) and/or difficult breathing of < / = 72 hours duration with LCI.

**Time till cessation of severe pneumonia**—The period starting from enrollment to the beginning of a 24-hour consecutive period of absence of LCI, of hypoxia and of any danger signs.

**Treatment failure**—A requirement for a change in antibiotics to second line therapy in those with failure to improve, development of complications such as empyema/pneumothorax requiring surgical intervention or admission to the intensive care unit for ventilator and/or inotropic support.

**Failure to improve**—Persistence of LCI or of any danger signs present at enrollment despite 48 hours of treatment or appearance of new danger signs or hypoxia with deterioration of a patient's clinical status any time after initiation of treatment.

**Clinical improvement**—Absence of danger signs, of hypoxia for a consecutive 24-hour, and of LCI for a 48-hour period.

**Duration of hypoxia**—The period from enrolment with SpO<sub>2</sub> < 90% on pulse oximetry to the beginning of a 24 hour consecutive period of SpO<sub>2</sub> > 90%, when breathing unassisted in room air.

Enrolled children were admitted to the hospital and monitored at 8 hourly intervals by study physicians until discharge. Benzyl penicillin (50,000 units/kg IV every 6 hourly) and Gentamicin (7.5 mg/kg IV once daily) were given till clinical improvement, following which children were discharged with advice to continue oral Amoxicillin to complete treatment for a total duration of 10 days. In addition, each participant received daily supplements (dispersible

tablets with either zinc or placebo) during their stay in the hospital and up to a maximum of 14 days [7].

Antibiotics were changed to Cefotaxime in children who did not improve. A decision to change antibiotics was made only after consultation with senior pediatricians involved in the study. For children unable to eat/drink or breast feed, intravenous fluids were initiated. Humidified oxygen was given to children with documented hypoxia and discontinued when they were no longer hypoxic. The absence of hypoxia was confirmed after a second reading taken 30 minutes later.

## Statistical Analyses

Data were analyzed using Stata version 13 (Stata Corp, College Station, TX). We fitted multiple regression models using clinical (Model 1), clinical and radiological (Model 2) and all (Model 3) variables. Age was used as a categorical variable. Predictors of time till cessation of a severe pneumonia episode were identified in Cox proportional hazards models with the “exactp” option to handle ties. For treatment failure, we used logistic regression. Outcomes were coded such that Hazard ratios (HR)  $< 1$  for time till recovery indicates slower resolution of illness and Odds ratios (OR)  $> 1$  increased odds of treatment failure. Initially we assessed the crude associations of relevant independent variables with the selected outcomes. Variables with  $p < 0.25$  were included in the multivariable models and those variables which were still significant, i.e. being associated with the outcome with a  $p$ -value of  $< 0.05$  retained in the model. In these models we included the other variables one at a time and kept if significant. This manual step-wise approach were outlined by Hosmer and Lemeshow [11].

We tested the goodness-of-fit of the models by the method suggested by Hosmer and Lemeshow [11] and for logistic regression by calculating the  $dfbetas$  and  $hat$  statistics. We assessed the assumptions for the cox models using tests of specification (plotting of Schoenfeld residuals) and goodness of fit.

## Results

We enrolled 610 children meeting criteria for an acute episode of severe pneumonia. We excluded from the analyses 11 children with heart disease and 1 child with chronic cough discovered after inclusion. During the study, 4 of the 7 children transferred to the pediatric intensive care unit died, 9 (1.5%) parents withdrew consent and 2 were diagnosed with tuberculosis. Demographic, clinical and laboratory characteristics of study participants are outlined in [Table 1](#). The median age of the 598 children was 6 [Interquartile range (IQR) 3–10] months, 61% were boys and 82% infants ( $< 12$  months). Mean respiratory rate [Standard deviation (SD)] was 64 (12), 62% were hypoxic and 49% had a danger sign, while 10% had 3 danger signs. On chest auscultation, 82% of the children had wheezing and 92% had crepitations. C-reactive protein (CRP)  $> 40$ mg/L was detected in 30%, 13% had CRP  $> 80$ mg/L. At least one virus was isolated from 29% of the nasopharyngeal specimens; RSV being the most frequent. Radiographic pneumonia, defined as endpoint consolidation on chest X-ray, was detected in 164 of 457 (36%) chest radiographs available for interpretation.

Median time (IQR) till recovery, using predefined criteria, was 49 (31, 87) hours while time till discharge (IQR) was 97 (83, 135). Treatment failure occurred in 209 of the 594 children (35%).

There was a near linear relationship between age and both outcomes, i.e. time till recovery and the risk of treatment failure (data not shown). An increment in age by one month was associated with an HR of 1.04 (95% CI: 1.03–1.06) for time till recovery and the OR for treatment failure was 0.93 (95% CI: 0.90–0.96).

**Table 1. Baseline Characteristics of children ages 2–35 months with WHO defined severe pneumonia.**

| Background Characteristics                                      | N   | Value      |
|-----------------------------------------------------------------|-----|------------|
| Median age in months (IQR)                                      | 598 | 6 (3, 10)  |
| <b>Age categories</b>                                           |     |            |
| • 2–6 months (%)                                                | 352 | 58.9       |
| • 7–11 months (%)                                               | 141 | 23.5       |
| • 12–23 months (%)                                              | 90  | 15.1       |
| • 24–35months (%)                                               | 15  | 2.5        |
| Boys (%)                                                        | 598 | 367 (61)   |
| Breastfed (%)                                                   | 598 | 571 (96)   |
| Wasted (Weight for height/length Z score < -2) (%) <sup>#</sup> | 594 | 157 (26)   |
| Stunted (Height for age Z score < - 2) (%) <sup>#</sup>         | 598 | 50 (8)     |
| Underweight (Weight for age Z score < - 2) (%) <sup>#</sup>     | 598 | 102 (17)   |
| Mean age of mother (SD)                                         | 586 | 24.4 (4.1) |
| Illiterate mother (%) <sup>##</sup>                             | 586 | 154 (26)   |
| Illiterate father (%) <sup>##</sup>                             | 588 | 38 (7)     |
| Unemployed mother (%) <sup>**</sup>                             | 584 | 418 (72)   |
| Unemployed father (%) <sup>**</sup>                             | 580 | 19 (3)     |
| <b>Clinical Characteristics</b>                                 |     |            |
| Mean Respiratory rate as breaths per minute (SD)                |     |            |
| • 2–11 months                                                   | 493 | 65(12)     |
| • 12–35 months                                                  | 105 | 61(12)     |
| Hypoxia (SpO <sub>2</sub> < 90%) at enrolment (%)               | 598 | 373 (62)   |
| Febrile (Axillary temperature > 38.5°C) (%)                     | 598 | 92 (15)    |
| <b>Danger signs (%)</b>                                         |     |            |
| -Nasal flaring                                                  | 597 | 232 (39)   |
| -Grunting                                                       | 598 | 131 (22)   |
| -Head nodding                                                   | 598 | 138 (23)   |
| -Cyanosis                                                       | 598 | 3 (0.5)    |
| • Any one danger sign                                           | 598 | 294 (49)   |
| • Presence of 3 danger signs                                    | 598 | 57 (10)    |
| • Presence of 2 danger signs                                    | 598 | 96 (16)    |
| • Presence of 1 danger sign                                     | 598 | 141 (24)   |
| Wheezing (%)                                                    | 598 | 492 (82)   |
| Crepitations (%)                                                | 598 | 549 (92)   |
| <b>Laboratory Characteristics</b>                               |     |            |
| Mean CRP in mg/L (SD)                                           |     |            |
| -CRP > 40mg/L                                                   | 572 | 170 (30)   |
| -CRP > 80mg/L                                                   | 572 | 75 (13)    |
| Nasopharyngeal aspirate positive for any virus (%)              |     |            |
| -Respiratory syncytial virus (%)                                | 596 | 79 (13)    |
| -Parainfluenza type 1 (%)                                       | 596 | 23 (4)     |
| -Parainfluenza type 2 (%)                                       | 596 | 5 (1)      |
| -Parainfluenza type 3 (%)                                       | 596 | 24 (4)     |
| -Influenza A (%)                                                | 596 | 24 (4)     |
| -Influenza B (%)                                                | 596 | 17 (2)     |
| -Human metapneumovirus (%)                                      | 596 | 9 (1)      |
| <b>Radiographic Pneumonia (%)</b>                               | 457 | 164 (36)   |

(Continued)

**Table 1.** (Continued)

| Background Characteristics | N   | Value    |
|----------------------------|-----|----------|
| Supplemented with zinc (%) | 598 | 299 (50) |

# Calculated using WHO Growth standards.

\*6 children were positive for 2 viruses simultaneously.

## No schooling with inability to read part or whole of a sentence.

\*\* No work/housework.

doi:10.1371/journal.pone.0122052.t001

Wasting (HR 0.79 95% CI: 0.65, 0.96), hypoxia (HR 0.62 95% CI: 0.51, 0.74) and presence of any danger sign (HR 0.76 95% CI: 0.64, 0.91) were independently associated with slower recovery (Table 2). These associations did not change substantially with the addition of other variables (Models 2 & 3). Radiographic pneumonia was also a significant predictor of delayed recovery (HR 0.58 95% CI: 0.47, 0.72). Presence of Parainfluenza type 1 (PIV 1) in the nasopharynx was associated with earlier recovery (HR 2.46 95%CI 1.48, 4.09). Gender, being breastfed, stunting, high fever, CRP > 40 and >80 mg/L, presence of other viruses and supplementation with oral zinc did not show any significant association with time till recovery (Table 2).

When estimating the association between child age categories and treatment failure, the older children had a lower risk of treatment failure (Table 3). While hypoxia and age categories up to 23 months remained as independent predictors, the oldest age group and any danger sign were no longer significant as indicators of treatment failure in models 2 and 3 (Table 3). Gender, being breastfed, stunted, having high fever, elevated CRP, viruses in the nasopharynx, and zinc supplementation were not significantly associated with treatment failure.

We repeated our regression analysis excluding hypoxia as a covariate in all three models and found very little change in the hazard and odds ratios of predictors, age and radiographic pneumonia identified earlier (data not shown). However, in the absence of hypoxia as a covariate, presence of at least one danger sign was a significant predictor of treatment failure in all models (data not shown). We also repeated the analyses using lower cut offs to define hypoxemia i.e. SpO<sub>2</sub> of 88% and 85% but the regression coefficients were only marginally altered (data not shown).

We explored possible interactions between independent variables using interaction terms (age x breastfeeding, age x wasting and age x any danger sign). Age did not modify the effect of breastfeeding, wasting or any danger sign in any of the models.

## Discussion

We report findings from secondary analyses of data from a clinical trial assessing the efficacy of zinc in childhood pneumonia. In this large prospective study of hospitalized young Nepalese children with acute severe pneumonia, median time till recovery of 2 days and treatment failure in 35%, independent predictors for both outcomes were younger age, radiographic consolidation and hypoxia on admission. In addition, wasting and any danger sign on admission was associated with prolonged duration of illness. With the exception of detecting PIV 1 from the nasopharynx, which signaled earlier recovery, presence of other viruses and raised CRP levels were not associated with either outcome. As this was a clinical trial on the efficacy of zinc in children with severe pneumonia, we also explored the possibility of differences in the outcomes between those who received the drug versus those who did not, and found no such interaction.



**Table 2. Predictors of Time till Recovery of illness episode in children 2–35 months hospitalized with WHO defined Severe Pneumonia.**

| Variables                                         | Crude Hazard Ratio*       | Adjusted Hazard Ratio* (number of observations) |                           |                           |
|---------------------------------------------------|---------------------------|-------------------------------------------------|---------------------------|---------------------------|
|                                                   |                           | Model 1 (594)                                   | Model 2 (455)             | Model 3 (454)             |
| <b>Age in months</b>                              | 1.04 (1.03, 1.06) < 0.001 |                                                 |                           |                           |
| <b>Age categories</b>                             |                           |                                                 |                           |                           |
| • 2–6 months                                      | 1.00                      | 1.00                                            | 1.00                      | 1.00                      |
| • 7–11 months                                     | 1.43 (1.17, 1.75) < 0.001 | 1.49 (1.21, 1.83) < 0.001                       | 1.53 (1.22, 1.94) < 0.001 | 1.22, 1.94) < 0.001       |
| • 12–23 months                                    | 1.55 (1.21, 1.97) < 0.001 | 1.68 (1.30, 2.16) < 0.001                       | 1.46 (1.09, 1.97) 0.012   | 1.09, 1.97) 0.012         |
| • 24–35months                                     | 3.39 (2.01, 5.71) < 0.001 | 4.22 (2.46, 7.25) < 0.001                       | 3.33 (1.77, 6.27) < 0.001 | 3.33 (1.77, 6.27) < 0.001 |
| <b>Gender</b>                                     | 1.11 (0.94, 1.31) 0.223   |                                                 |                           |                           |
| <b>Breastfed</b>                                  | 0.97 (0.64, 1.47) 0.882   |                                                 |                           |                           |
| <b>Wasting</b> (< -2 Weight for height/length)    | 0.76 (0.63, 0.91) 0.004   | 0.79 (0.65, 0.96) 0.017                         | 0.79 (0.64, 0.98) 0.030   | 0.78 (0.63, 0.96) 0.022   |
| <b>Stunting</b> (< -2 Height/length for age)      | 0.84 (0.62, 1.14) 0.261   |                                                 |                           |                           |
| <b>Hypoxia</b> (SpO2 < 90%)                       | 0.64 (0.54, 0.76) < 0.001 | 0.62 (0.51, 0.74) < 0.001                       | 0.71 (0.58, 0.88) 0.001   | 0.72 (0.58, 0.89) 0.002   |
| <b>Febrile</b> (Axillary temperature > 38.5°C)    | 1.14 (0.91, 1.43) 0.248   |                                                 |                           |                           |
| <b>Any danger sign</b>                            | 0.69 (0.59, 0.82) < 0.001 | 0.76 (0.64, 0.91) 0.003                         | 0.74 (0.60, 0.90) 0.003   | 0.76 (0.62, 0.92) 0.006   |
| <b>Radiographic pneumonia</b>                     | 0.56 (0.46, 0.69) < 0.001 |                                                 | 0.58 (0.47, 0.72) < 0.001 | 0.55 (0.45, 0.68) < 0.001 |
| <b>C-Reactive Protein (CRP) &gt; 40 mg/L</b>      | 1.01 (0.84, 1.21) 0.918   |                                                 |                           |                           |
| <b>Nasopharyngeal aspirate positive for virus</b> |                           |                                                 |                           |                           |
| • Respiratory syncytial virus (RSV)               | (0.62, 0.99) 0.049        |                                                 |                           |                           |
| • Influenza A                                     | 0.78 (0.52, 1.19) 0.252   |                                                 |                           |                           |
| • Influenza B                                     | (0.49, 1.33) 0.399        |                                                 |                           |                           |
| • Parainfluenza type 1 (PIV 1)                    | 1.75 (1.14, 2.69) 0.010   |                                                 |                           | 2.46 (1.48, 4.09) < 0.001 |
| • Parainfluenza type 2 (PIV 2)                    | (0.40, 2.36) 0.957        |                                                 |                           |                           |
| • Parainfluenza type 3 (PIV 3)                    | (0.96, 2.17) 0.082        |                                                 |                           |                           |
| • Human metapneumovirus (hMPV)                    | 0.64 (0.32, 1.28) 0.203   |                                                 |                           |                           |
| <b>Supplemented with zinc</b>                     | 1.11 (0.94, 1.31) 0.221   |                                                 |                           |                           |

\*Hazard ratios (95% CI) and P-value calculated using Cox Regression with exact p option. Hazard ratios <1 for time till recovery indicates slower resolution of illness.

Results of multiple regressions with P-value > 0.05 not shown in the table.

Model 1 (Clinical variables): Adjusted for gender, breastfed, febrile and treatment with zinc.

Model 2 (Clinical + Radiographic pneumonia): Adjusted for gender, breastfed, febrile and treatment with zinc.

Model 3 (All variables): Adjusted for gender, breastfed, febrile, CRP, nasopharyngeal aspirate positive for RSV, influenza A and B, PIV 2 and 3 and hMPV and treatment with zinc.

doi:10.1371/journal.pone.0122052.t002

While several studies report on predictors of death [12–15], we were unable to find any exploring clinical risk factors for duration of illness of a severe pneumonia episode in young children. In our study only 4 children died in the hospital, and mortality was not an outcome. Hypoxia, a significant predictor of death in most of the studies [12,13,15] was an independent predictor of time till resolution of illness. While studies have identified younger children to be at a higher risk of death [14,15], we found slower time till recovery with decreasing age (Table 2). To our knowledge, this is the first study to identify age as an independent predictor of the duration of severe pneumonia.

The proportions with treatment failure in large multicenter clinical trials conducted in hospitalized children with severe pneumonia were 13.6% [16] and 20% [17]. These estimates are different from our study (35%) and may partly be due to the differences in outcome definition. Similar to the present study, hypoxia on admission was identified as an independent predictor

**Table 3. Predictors of Treatment failure of illness episode in children 2–35 months hospitalized with WHO defined Severe Pneumonia**

| Variables                                         | Crude Odds Ratio*         | Adjusted Odds ratio* (number of observations per model) |                          |                          |
|---------------------------------------------------|---------------------------|---------------------------------------------------------|--------------------------|--------------------------|
|                                                   |                           | Model 1 (590)                                           | Model 2 (455)            | Model 3 (454)            |
| <b>Age in months</b>                              | 0.93 (0.90, 0.96) <0.001  |                                                         |                          |                          |
| <b>Age categories</b>                             |                           |                                                         |                          |                          |
| • 2–6 months                                      | 1.00                      | 1.00                                                    | 1.00                     | 1.00                     |
| • 7–11 months                                     | 0.67 (0.44, 1.01) 0.058   | 0.61 (0.40, 0.94) 0.024                                 | 0.56 (0.34, 0.91) 0.019  | 0.55 (0.34, 0.90) 0.018  |
| • 12–23 months                                    | 0.37 (0.21, 0.64) <0.001  | 0.33 (0.19, 0.58) <0.001                                | 0.27 (0.13, 0.55) <0.001 | 0.27 (0.13, 0.55) <0.001 |
| • 24–35months                                     | 0.22 (0.05, 0.99) 0.049   | 0.18 (0.04, 0.83) 0.028                                 | 0.31 (0.06, 1.54) 0.153  | 0.34 (0.07, 1.72) 0.194  |
| <b>Gender</b>                                     | 0.83 (0.59,1.18) 0.296    |                                                         |                          |                          |
| <b>Breastfed</b>                                  | 0.67 (0.28,1.61) 0.370    |                                                         |                          |                          |
| Wasting (594) (< -2 Weight for height/length)     | 1.49 (1.02, 2.16) 0.038   |                                                         |                          |                          |
| Stunting (598) (< -2 Height/Length for age)       | 1.25 (0.69, 2.27) 0.457   |                                                         |                          |                          |
| <b>Hypoxia (SpO2 &lt; 90%)</b>                    | 1.91 (1.33, 2.74) <0.001  | 2.00 (1.36, 2.93) <0.001                                | 1.80 (1.15, 2.80) 0.010  | 1.81 (1.16, 2.83) 0.009  |
| <b>Febrile (Axillary temperature &gt; 38.5°C)</b> | 0.94 (0.59, 1.51) 0.808   |                                                         |                          |                          |
| <b>Any danger sign</b>                            | 1.65 (1.18, 2.32) 0.004   | 1.44 (1.01, 2.07) 0.045                                 |                          |                          |
| <b>Radiographic pneumonia</b>                     | 2.22 (1.49, 3.31) < 0.001 |                                                         | 2.09 (1.37, 3.19) 0.001  | 2.12 (1.39, 3.24) 0.001  |
| <b>C-Reactive Protein (CRP) &gt; 40 mg/L</b>      | 1.15 (0.79, 1.67) 0.472   |                                                         |                          |                          |
| <b>Nasopharyngeal aspirate positive for virus</b> |                           |                                                         |                          |                          |
| • Respiratory syncytial virus (RSV)               | 1.47 (0.91, 2.38) 0.115   |                                                         |                          |                          |
| • Influenza A                                     | 0.31, 1.84) 0.533         |                                                         |                          |                          |
| • Influenza B                                     | 0.37, 2.76) 0.989         |                                                         |                          |                          |
| • Parainfluenza type 1 (PIV 1)                    | 0.18, 1.37) 0.178         |                                                         |                          |                          |
| • Parainfluenza type 2 (PIV 2)                    | 0.20, 7.44) 0.819         |                                                         |                          |                          |
| • Parainfluenza type 3 (PIV 3)                    | 0.12, 1.06) 0.063         |                                                         |                          |                          |
| • Human metapneumovirus (hMPV)                    | 2.34 (0.62, 8.81) 0.209   |                                                         |                          |                          |
| <b>Supplemented with zinc</b>                     | 0.83 (0.60, 1.17) 0.291   |                                                         |                          |                          |

\*Odds ratios (95% CI) and P-value calculated using Logistic Regression. Odds ratios > 1 indicates increased odds of treatment failure.

Results of multiple regressions with P-value >0.05 not shown in the table with the exception of age analyzed as a categorical variable.

Model 1 (Clinical variables): Adjusted for gender, breastfed, wasting, febrile and treatment with zinc.

Model 2 (Clinical + Radiographic pneumonia): Adjusted for gender, breastfed, wasting, febrile, any danger sign and treatment with zinc.

Model 3 (All variables): Adjusted for gender, breastfed, wasting, febrile, any danger sign, CRP, nasopharyngeal aspirate positive for RSV, PIV 1, 2 and 3, influenza A and B, hMPV and treatment with zinc.

doi:10.1371/journal.pone.0122052.t003

of treatment failure in both studies. The trends for age as a predictor were similar in our study and the study by Fu. *et al.* [18], with younger children having a higher risk of treatment failure.

We found hypoxia to be a predictor of both treatment failure and illness duration in our study. With hypoxia removed as a covariate, presence of any danger sign was a significant predictor of treatment failure in all three models. The variables hypoxia and any danger sign were correlated, which is expected as both are known indicators of severe pneumonia. Clinical predictors may not be easily recognized whereas measurement of oxygen saturation with a pulse oximeter, when performed correctly, to document hypoxia seems to be a more reliable and objective sign to assess severity. Pulse oximetry, the ‘fifth pediatric vital sign’ [19] supplemented by treatment with oxygen was found to be a feasible and cost effective intervention for childhood pneumonia with 35% reduction in mortality in Papua New Guinea [20]. Unfortunately even though pulse oximeters and oxygen are available, they are underutilized by health workers



in developing countries [21,22]. Pulse oximetry to document hypoxia in community acquired pneumonia is not only endorsed by professional societies in developed countries [23,24] but also stated in recent WHO guidelines [6] and our findings support these recommendations.

We identified one study in India [25] reporting lobar consolidation as a predictor of longer stay in hospital but this was based on unadjusted analysis and therefore not comparable to the results of our study. The two studies that report an association between radiographic consolidation and mortality in hospitalized children with severe pneumonia have conflicting results. While Lupisan *et al.* [14] found dense infiltrates to be an independent predictor, Reed *et al.* [12] report that alveolar consolidation on multiple regression analysis was not significant. Primary end point consolidation was an independent predictor of treatment failure at 48 hours of hospitalization especially among penicillin recipients (RR 3.58 95% CI: 1.47, 8.75) in the study by Patel *et al.* [17], a finding very similar to what we found. In our study, chest radiograph was done to screen for exclusion criteria and had no role in the initial diagnosis and management of enrolled patients. We found that addition of radiographic pneumonia to the analyses (Models 2 and 3) did not substantially change the estimates of independent clinical predictors of both outcomes (Tables 2 and 3). In resource poor settings, diagnosis of severe pneumonia relies heavily on clinical signs. An initial chest radiograph in uncomplicated but severe community acquired pneumonia would not change initial management with empirical antibiotic therapy in such settings. Our findings support the WHO guidelines [6] which state that radiographs in severe pneumonia should be done only when possible.

We report findings from a randomized clinical trial [7] conducted under controlled settings. Our findings may therefore not be directly applicable to other hospitals caring for children in developing countries. We used previous WHO guidelines [8] requiring only lower chest indrawing in addition to symptoms to define severe pneumonia as inclusion criteria. Although we took measures to screen out children with reactive airways, we may have included those with pneumonia that could have been treated as outpatients. While recruiting, we excluded very sick children with pneumonia and probably missed those with other signs of severe pneumonia in the absence of LCI and this may also have affected our observed associations. While we were able to detect several predictors for duration and treatment failure, for many of the selected independent variables such as fever and breastfeeding, the power to detect any significant association with the outcomes was low. It should be noted that the study was designed to measure the effect of zinc supplementation during pneumonia and not to identify these predictors.

This large study on children aged between 2–35 months, with acute severe pneumonia found younger age, hypoxia on admission and radiographic pneumonia to independently predict both time to resolution and treatment failure. As it is the only study till date to report on predictors of illness duration we believe our findings to be relevant, not only to characterize but also manage a severe pneumonia episode in hospitalized children from resource poor settings. Our results indicate that a chest radiograph is not always needed but the detection and treatment of hypoxia is a crucial step in the management of children admitted to health care settings with pneumonia.

## Supporting Information

### S1 Dataset.

(XLSX)

## Acknowledgments

We are grateful to all the children and their families who took part in the study. We are indebted to the study physicians, senior pediatrician Dr Renu Prasai and other members of the Zinc

Severe Pneumonia Study Group for their contribution to the study as well as other staff of the Child Health Research Project and Kanti Children Hospital for their invaluable support. We also thank all faculty members of the Child Health Department for their support and the Department of Microbiology, Tribhuvan University Teaching Hospital, Kathmandu, for providing the laboratory facilities.

## Author Contributions

Conceived and designed the experiments: SB MM HS TAS AS PSS PVB. Performed the experiments: SB MM HS TAS AS PSS PVB RKG DMS. Analyzed the data: SB MM HS TAS. Contributed reagents/materials/analysis tools: MM TAS. Wrote the paper: SB MM HS TAS AS PSS PVB RKG DMS. Collection of biological specimens: MM. Virus analyses: MM. Interpretation of chest radiographs: RKG DMS. Interpretation of the manuscript: AS PSS PVB RKG DMS.

## References

1. Walker CL, Rudan I, Liu L, Nair H, Theodoratou E, Bhutta ZA, et al. (2013) Global burden of childhood pneumonia and diarrhoea. *Lancet* 381: 1405–1416. doi: [10.1016/S0140-6736\(13\)60222-6](https://doi.org/10.1016/S0140-6736(13)60222-6) PMID: [23582727](https://pubmed.ncbi.nlm.nih.gov/23582727/)
2. Rudan I, El Arifeen S, Bhutta ZA, Black RE, Brooks A, Cha KY, et al. (2011) Setting research priorities to reduce global mortality from childhood pneumonia by 2015. *PLoS Med* 8: e1001099. doi: [10.1371/journal.pmed.1001099](https://doi.org/10.1371/journal.pmed.1001099) PMID: [21980266](https://pubmed.ncbi.nlm.nih.gov/21980266/)
3. Rudan I, O'Brien KL, Nair H, Liu L, Theodoratou E, Qazi S, et al. (2013) Epidemiology and etiology of childhood pneumonia in 2010: estimates of incidence, severe morbidity, mortality, underlying risk factors and causative pathogens for 192 countries. *J Glob Health* 3: 010401. doi: [10.7189/jogh.03.010401](https://doi.org/10.7189/jogh.03.010401) PMID: [23826505](https://pubmed.ncbi.nlm.nih.gov/23826505/)
4. Jackson S, Mathews KH, Pulanic D, Falconer R, Rudan I, Campbell H, et al. (2013) Risk factors for severe acute lower respiratory infections in children: a systematic review and meta-analysis. *Croat Med J* 54: 110–121. PMID: [23630139](https://pubmed.ncbi.nlm.nih.gov/23630139/)
5. WHO (2014) Integrated Management of Childhood Illness. Chart Booklet.
6. WHO (2013) Pocket Book of Hospital Care for Children: Guidelines for the Management of Common Childhood Illnesses. Geneva: World Health Organization Copyright (c) World Health Organization 2013.
7. Basnet S, Shrestha PS, Sharma A, Mathisen M, Prasai R, Bhandari N, et al. (2012) A randomized controlled trial of zinc as adjuvant therapy for severe pneumonia in young children. *Pediatrics* 129: 701–708. doi: [10.1542/peds.2010-3091](https://doi.org/10.1542/peds.2010-3091) PMID: [22392179](https://pubmed.ncbi.nlm.nih.gov/22392179/)
8. WHO (2005) Pocket book of hospital care for children Guidelines for the management of common illnesses with limited resources.
9. Cherian T, Mulholland EK, Carlin JB, Ostensen H, Amin R, de Campo M, et al. (2005) Standardized interpretation of paediatric chest radiographs for the diagnosis of pneumonia in epidemiological studies. *Bull World Health Organ* 83: 353–359. PMID: [15976876](https://pubmed.ncbi.nlm.nih.gov/15976876/)
10. Mathisen M, Basnet S, Sharma A, Shrestha PS, Sharma BN, Valentiner-Branth P, et al. (2011) RNA viruses in young Nepalese children hospitalized with severe pneumonia. *Pediatr Infect Dis J* 30: 1032–1036. doi: [10.1097/INF.0b013e31822f845f](https://doi.org/10.1097/INF.0b013e31822f845f) PMID: [21860338](https://pubmed.ncbi.nlm.nih.gov/21860338/)
11. Hosmer DW, Lemeshow S (2005) Applied logistic regression. New York: John Wiley & Sons, Inc.
12. Reed C, Madhi SA, Klugman KP, Kuwanda L, Ortiz JR, Finelli L, et al. (2012) Development of the Respiratory Index of Severity in Children (RISC) score among young children with respiratory infections in South Africa. *PLoS One* 7: e27793. doi: [10.1371/journal.pone.0027793](https://doi.org/10.1371/journal.pone.0027793) PMID: [22238570](https://pubmed.ncbi.nlm.nih.gov/22238570/)
13. Sigauque B, Roca A, Bassat Q, Morais L, Quinto L, Berenguer A, et al. (2009) Severe pneumonia in Mozambican young children: clinical and radiological characteristics and risk factors. *J Trop Pediatr* 55: 379–387. doi: [10.1093/tropej/fmp030](https://doi.org/10.1093/tropej/fmp030) PMID: [19401405](https://pubmed.ncbi.nlm.nih.gov/19401405/)
14. Lupisan SP, Ruutu P, Erma Abucejo-Ladesma P, Quiambao BP, Gozum L, Sombrero LT, et al. (2007) Predictors of death from severe pneumonia among children 2–59 months old hospitalized in Bohol, Philippines: implications for referral criteria at a first-level health facility. *Trop Med Int Health* 12: 962–971. PMID: [17697091](https://pubmed.ncbi.nlm.nih.gov/17697091/)

15. Djelantik IG, Gessner BD, Sutanto A, Steinhoff M, Linehan M, Moulton LH, et al. (2003) Case fatality proportions and predictive factors for mortality among children hospitalized with severe pneumonia in a rural developing country setting. *J Trop Pediatr* 49: 327–332. PMID: [14725409](#)
16. Asghar R, Banajeh S, Egas J, Hibberd P, Iqbal I, Katep-Bwalya M, et al. (2008) Chloramphenicol versus ampicillin plus gentamicin for community acquired very severe pneumonia among children aged 2–59 months in low resource settings: multicentre randomised controlled trial (SPEAR study). *Bmj* 336: 80–84. doi: [10.1136/bmj.39421.435949.BE](#) PMID: [18182412](#)
17. Patel A, Mamtani M, Hibberd PL, Tuan TA, Jeena P, Chisaka N, et al. (2008) Value of chest radiography in predicting treatment response in children aged 3–59 months with severe pneumonia. *Int J Tuberc Lung Dis* 12: 1320–1326. PMID: [18926044](#)
18. Fu LY, Ruthazer R, Wilson I, Patel A, Fox LM, Tuan TA, et al. (2006) Brief hospitalization and pulse oximetry for predicting amoxicillin treatment failure in children with severe pneumonia. *Pediatrics* 118: e1822–1830. PMID: [17142503](#)
19. Mower WR, Sachs C, Nicklin EL, Baraff LJ (1997) Pulse oximetry as a fifth pediatric vital sign. *Pediatrics* 99: 681–686. PMID: [9113944](#)
20. Duke T, Wandt F, Jonathan M, Matai S, Kaupa M, Saavu M, et al. (2008) Improved oxygen systems for childhood pneumonia: a multihospital effectiveness study in Papua New Guinea. *Lancet* 372: 1328–1333. doi: [10.1016/S0140-6736\(08\)61164-2](#) PMID: [18708248](#)
21. Ginsburg AS, Gerth-Guyette E, Mollis B, Gardner M, Chham S (2014) Oxygen and pulse oximetry in childhood pneumonia: surveys of clinicians and student clinicians in Cambodia. *Trop Med Int Health* 19: 537–544. doi: [10.1111/tmi.12291](#) PMID: [24628874](#)
22. Ginsburg AS, Van Cleve WC, Thompson MI, English M (2012) Oxygen and pulse oximetry in childhood pneumonia: a survey of healthcare providers in resource-limited settings. *J Trop Pediatr* 58: 389–393. doi: [10.1093/tropej/fmr103](#) PMID: [22170511](#)
23. Bradley JS, Byington CL, Shah SS, Alverson B, Carter ER, Harrison C, et al. (2011) Executive Summary: The Management of Community-Acquired Pneumonia in Infants and Children Older Than 3 Months of Age: Clinical Practice Guidelines by the Pediatric Infectious Diseases Society and the Infectious Diseases Society of America. *Clinical Infectious Diseases* 53: 617–630. doi: [10.1093/cid/cir625](#) PMID: [21890766](#)
24. Harris M, Clark J, Coote N, Fletcher P, Harnden A, McKean M, et al. (2011) British Thoracic Society guidelines for the management of community acquired pneumonia in children: update 2011. *Thorax* 66 Suppl 2: ii1–23. doi: [10.1136/thoraxjnl-2011-200598](#) PMID: [21903691](#)
25. Bharti B, Kaur L, Bharti S (2008) Role of chest X-ray in predicting outcome of acute severe pneumonia. *Indian Pediatr* 45: 893–898. PMID: [19029561](#)
